# Supplementary material
Source: Springer Nature journal article supplement (https://www.springermedizin.de/resource/supplementary/13063_2014_2090_MOESM1_ESM.pdf/9621364)

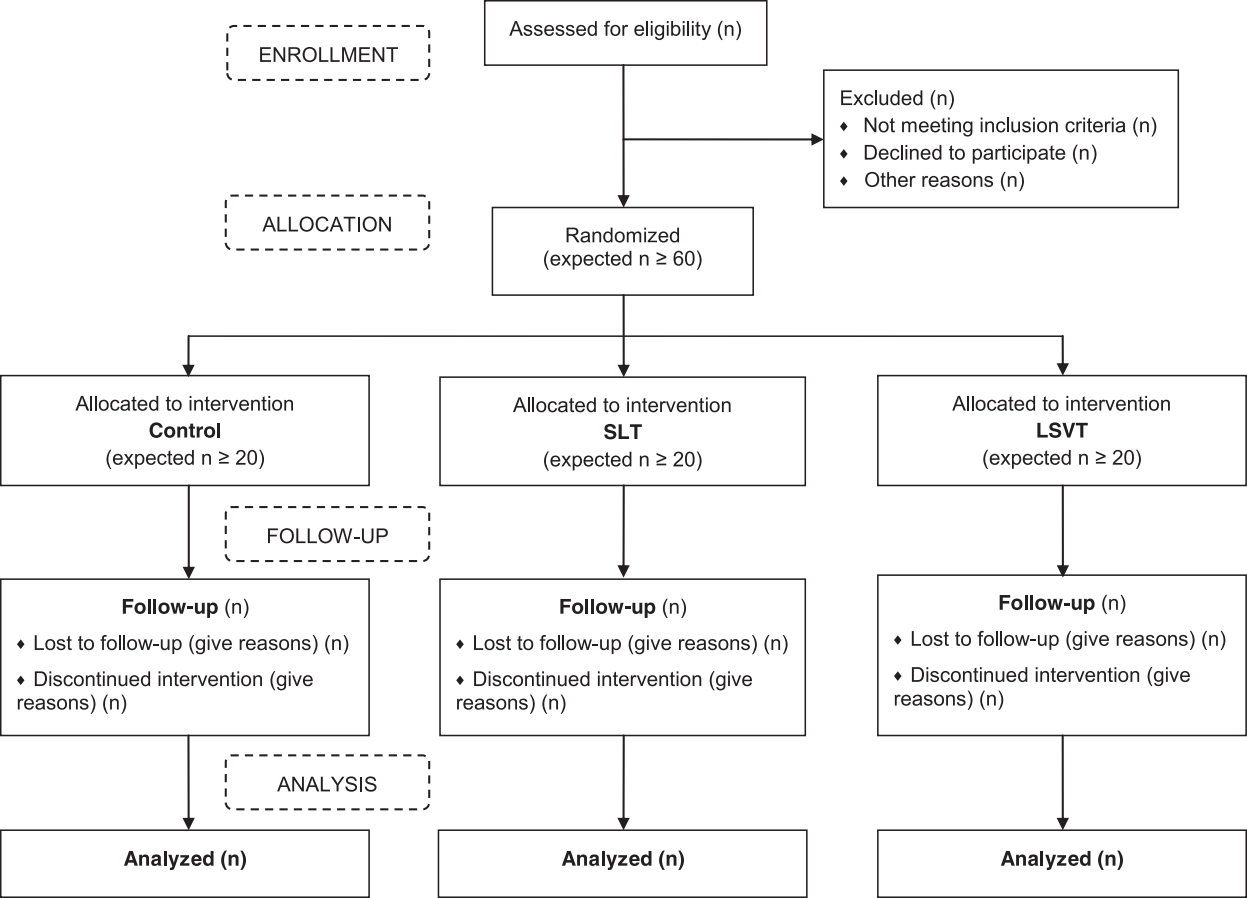

Supplement: MOESM1 [file 9621364]
